# Supplementary material for: Does Flory–Rehner theory quantitatively describe the swelling of thermoresponsive microgels?
Source: Royal Society of Chemistry journal article supplement (doi:10.1039/c7sm01274h), 2017-01-01
Supplement: c7sm01274h1.xlsx [file c7sm01274h1.xlsx]

## Sheet: FloryRehner
Column B calulates 1/T according to equations 3 and 4 in the main text							vs	18.1								A	-1.35
Column C calculates the absolute temperature from Column B							M0*NA	113								C (chi2)	0.369
Column D calculates the temperature in celcius							rho	1.1								D	0.146
Column A provides the different values of phi, which is the independent variable																theta	303.6
Column E calculates RH assuming a collapsed volume fraction of 0.8 and a radius at T = 40 fiven by cell R5																R_40	42.6
Column F calculates the hydrodynamic diameter dH																f	0.05
																phi_0	0.03
	Cell B9 calculates the prefactor in equation S1															phi_40	0.44
	0.352389
phi (vol fraction)	1/T	T (K)	T_Celsius	R_H	dH
0.01	0.0100873	99.1348	-174.025	150.393	300.786
0.01038	0.00962708	103.874	-169.126	148.535	297.069
0.0107744	0.00919649	108.737	-164.263	146.7	293.399
0.0111839	0.00879364	113.719	-159.281	144.887	289.774
0.0116089	0.0084168	118.81	-154.19	143.097	286.194
0.01205	0.00806434	124.003	-148.997	141.329	282.658
0.0125079	0.00773473	129.287	-143.713	139.583	279.166
0.0129832	0.00742654	134.652	-138.348	137.858	275.717
0.0134766	0.00713841	140.087	-132.913	136.155	272.31
0.0139887	0.00686908	145.58	-127.42	134.473	268.946
0.0145202	0.00661737	151.118	-121.882	132.812	265.623
0.015072	0.00638216	156.687	-116.313	131.171	262.341
0.0156447	0.00616242	162.274	-110.726	129.55	259.1
0.0162392	0.00595715	167.865	-105.135	127.95	255.899
0.0168563	0.00576546	173.447	-99.5532	126.369	252.737
0.0174969	0.00558646	179.004	-93.9958	124.807	249.615
0.0181617	0.00541937	184.523	-88.4765	123.265	246.531
0.0188519	0.00526341	189.991	-83.009	121.742	243.485
0.0195683	0.00511788	195.393	-77.6065	120.238	240.477
0.0203119	0.00498211	200.718	-72.282	118.753	237.506
0.0210837	0.00485549	205.953	-67.0474	117.286	234.571
0.0218849	0.00473741	211.086	-61.9144	115.837	231.673
0.0227165	0.00462734	216.107	-56.8933	114.405	228.811
0.0235797	0.00452477	221.006	-51.9941	112.992	225.984
0.0244758	0.00442919	225.775	-47.2253	111.596	223.192
0.0254059	0.00434018	230.405	-42.5947	110.217	220.434
0.0263713	0.00425729	234.891	-38.109	108.855	217.711
0.0273734	0.00418014	239.226	-33.7738	107.511	215.021
0.0284136	0.00410836	243.406	-29.5936	106.182	212.364
0.0294933	0.00404158	247.428	-25.572	104.87	209.741
0.030614	0.00397949	251.288	-21.7116	103.575	207.149
0.0317774	0.00392178	254.986	-18.014	102.295	204.59
0.0329849	0.00386817	258.52	-14.4797	101.031	202.062
0.0342383	0.00381838	261.891	-11.1086	99.7829	199.566
0.0355394	0.00377216	265.1	-7.89978	98.5501	197.1
0.0368899	0.00372928	268.149	-4.85148	97.3325	194.665
0.0382917	0.00368951	271.039	-1.96134	96.13	192.26
0.0397468	0.00365265	273.774	0.77357	94.9423	189.885
0.0412572	0.00361851	276.357	3.3567	93.7693	187.539
0.0428249	0.0035869	278.792	5.79195	92.6108	185.222
0.0444523	0.00355766	281.084	8.08359	91.4666	182.933
0.0461415	0.00353062	283.236	10.2362	90.3365	180.673
0.0478949	0.00350564	285.255	12.2546	89.2204	178.441
0.0497149	0.00348258	287.144	14.1438	88.1181	176.236
0.051604	0.0034613	288.909	15.909	87.0294	174.059
0.053565	0.00344168	290.555	17.5554	85.9542	171.908
0.0556004	0.00342362	292.088	19.0883	84.8922	169.784
0.0577133	0.003407	293.513	20.513	83.8433	167.687
0.0599064	0.00339173	294.835	21.8347	82.8075	165.615
0.0621828	0.00337771	296.059	23.0588	81.7844	163.569
0.0645458	0.00336485	297.19	24.1903	80.7739	161.548
0.0669985	0.00335307	298.234	25.2343	79.776	159.552
0.0695444	0.0033423	299.196	26.1956	78.7904	157.581
0.0721871	0.00333245	300.079	27.0791	77.8169	155.634
0.0749302	0.00332348	300.889	27.8893	76.8555	153.711
0.0777776	0.00331531	301.631	28.6308	75.9059	151.812
0.0807331	0.00330789	302.308	29.3079	74.9681	149.936
0.083801	0.00330115	302.925	29.9246	74.0419	148.084
0.0869854	0.00329506	303.485	30.485	73.1271	146.254
0.0902909	0.00328955	303.993	30.9929	72.2236	144.447
0.0937219	0.00328459	304.452	31.4519	71.3313	142.663
0.0972834	0.00328014	304.865	31.8654	70.45	140.9
0.10098	0.00327614	305.237	32.2368	69.5796	139.159
0.104817	0.00327258	305.569	32.5693	68.7199	137.44
0.1088	0.00326941	305.866	32.8658	67.8709	135.742
0.112935	0.0032666	306.129	33.1292	67.0324	134.065
0.117226	0.00326411	306.362	33.3622	66.2042	132.408
0.121681	0.00326192	306.567	33.5675	65.3862	130.772
0.126305	0.00326001	306.747	33.7475	64.5784	129.157
0.131104	0.00325834	306.905	33.9046	63.7805	127.561
0.136086	0.00325689	307.041	34.041	62.9925	125.985
0.141258	0.00325564	307.159	34.159	62.2142	124.428
0.146625	0.00325457	307.261	34.2606	61.4456	122.891
0.152197	0.00325364	307.348	34.3479	60.6864	121.373
0.157981	0.00325285	307.423	34.4229	59.9366	119.873
0.163984	0.00325217	307.487	34.4873	59.1961	118.392
0.170215	0.00325157	307.543	34.5433	58.4648	116.93
0.176684	0.00325105	307.593	34.5925	57.7424	115.485
0.183398	0.00325058	307.637	34.6369	57.029	114.058
0.190367	0.00325015	307.678	34.6784	56.3244	112.649
0.197601	0.00324972	307.719	34.7188	55.6285	111.257
0.205109	0.00324928	307.76	34.7601	54.9413	109.883
0.212904	0.00324882	307.804	34.8042	54.2625	108.525
0.220994	0.0032483	307.853	34.8533	53.5921	107.184
0.229392	0.00324771	307.91	34.9096	52.9299	105.86
0.238109	0.00324701	307.975	34.9754	52.276	104.552
0.247157	0.00324619	308.053	35.0532	51.6301	103.26
0.256549	0.00324522	308.146	35.1457	50.9922	101.984
0.266298	0.00324406	308.256	35.256	50.3622	100.724
0.276417	0.00324268	308.387	35.3873	49.74	99.48
0.286921	0.00324104	308.543	35.5432	49.1255	98.2509
0.297824	0.0032391	308.728	35.7279	48.5185	97.037
0.309141	0.00323681	308.946	35.9458	47.9191	95.8381
0.320888	0.00323413	309.202	36.2023	47.327	94.654
0.333082	0.00323098	309.503	36.5033	46.7423	93.4846
0.345739	0.00322731	309.856	36.8556	46.1648	92.3296
0.358877	0.00322303	310.267	37.267	45.5944	91.1889
0.372515	0.00321806	310.747	37.7466	45.0311	90.0622
0.38667	0.00321228	311.305	38.3052	44.4748	88.9495
0.401364	0.00320559	311.955	38.9553	43.9253	87.8506
0.416615	0.00319783	312.712	39.7118	43.3826	86.7652
0.432447	0.00318886	313.592	40.5922	42.8466	85.6932
0.44888	0.00317846	314.618	41.6177	42.3172	84.6344
0.465937	0.00316642	315.814	42.8141	41.7944	83.5888
0.483643	0.00315246	317.213	44.2126	41.278	82.556
0.502021	0.00313625	318.852	45.8517	40.768	81.5361
0.521098	0.00311741	320.779	47.7794	40.2643	80.5287
0.5409	0.00309544	323.056	50.0561	39.7669	79.5338
0.561454	0.00306975	325.759	52.7589	39.2756	78.5511
0.582789	0.00303962	328.988	55.988	38.7903	77.5806
0.604935	0.00300412	332.876	59.8757	38.3111	76.6221
0.627923	0.00296208	337.6	64.6003	37.8377	75.6755
0.651784	0.00291199	343.408	70.4081	37.3702	74.7405
0.676552	0.00285185	350.65	77.6497	36.9085	73.8171
0.702261	0.002779	359.842	86.842	36.4525	72.9051
0.728946	0.00268976	371.781	98.7806	36.0022	72.0043
0.756646	0.00257891	387.76	114.76	35.5574	71.1147
0.785399	0.00243876	410.044	137.044	35.118	70.2361
0.815244	0.00225736	442.995	169.995	34.6842	69.3683
0.846223	0.0020149	496.303	223.303	34.2556	68.5113
0.87838	0.0016753	596.908	323.908	33.8324	67.6648
0.911758	0.0011628	859.99	586.99	33.4144	66.8288
0.946405	0.000273407	3657.54	3384.54	33.0016	66.0032
0.982369	-0.00200118	-499.706	-772.706	32.5939	65.1877
