# Supplementary material for: Does Flory–Rehner theory quantitatively describe the swelling of thermoresponsive microgels?
Source: Royal Society of Chemistry journal article supplement (doi:10.1039/c7sm01274h), 2017-01-01
Supplement: c7sm01274h2.pdf [file c7sm01274h2.pdf]

## Supporting Information: Does Flory-Rehner theory quantitatively describe the swelling of thermosensitive microgels?\*

Carlos G. Lopez<sup>1, a)</sup> and Walter Richtering<sup>1</sup>

*Institute of Physical Chemistry, RWTH Aachen University, Landoltweg 2, D-52056 Aachen, Germany*

### I. CALCULATION OF PRE-FACTOR TO ELASTIC TERM.

The mass in grams of polymer in a microgel at the reference state is  $M = V_0 \phi_0 \rho_p$  and the total number of monomers is given by  $N_M = MN_A/M_0$  where  $M_0$  is the mass of the cross-linker. The number of crosslinks in the microgel is then  $N_{CL} = N_M f$  and since each cross-linker molecule generates two chains, the number of chains in a microgel particle is  $N_c = 2N_{CL}$ . The prefactor to the elastic term in equation 4 of the main text is then

$$\frac{N_c v_s}{V_0 N_A} \simeq \frac{2\phi_0 \rho_p f v_s}{M_0 N_A}$$

This prefactor to for PNIPAM in water, cross-linked with BIS ( $\phi_p = 1.1$  g/mL,  $M_0 \times N_A = 113$ g and  $v_s = 18$  mL) reduces to:

$$\frac{N_c v_s}{V_0 N_A} \simeq 0.35 \phi_0 f \quad (1)$$

A spreadsheet calculating  $\phi$  and  $R_H$  as a function  $\phi_0$ ,  $\theta$ ,  $A$ ,  $C$  and  $D$  is provided.

### II. FLORY-RHENER FITS TO LITERATURE DATASETS.

Figure S1 shows Flory-Rehner fits to the datasets considered in Table 1 of the main manuscript. Figure S2 shows fits of the Flory-Rehner model to the two samples with lowest cross-linking densities of reference [1] leaving  $\phi_0$  as a free parameter. The fit parameter values for these are presented in Table 1 of the main text in brackets. The microgel of Acciario et al prepared by the feeding method and the sample of Arleth et al are reported to be uniformly cross-linked.

### III. FITS WITH VARYING $f$

Fit results to the datasets by Senff and Richtering<sup>1</sup> were considered in the main manuscript using the cross-link density calculated from synthesis  $f_{syn}$ . Figure S3

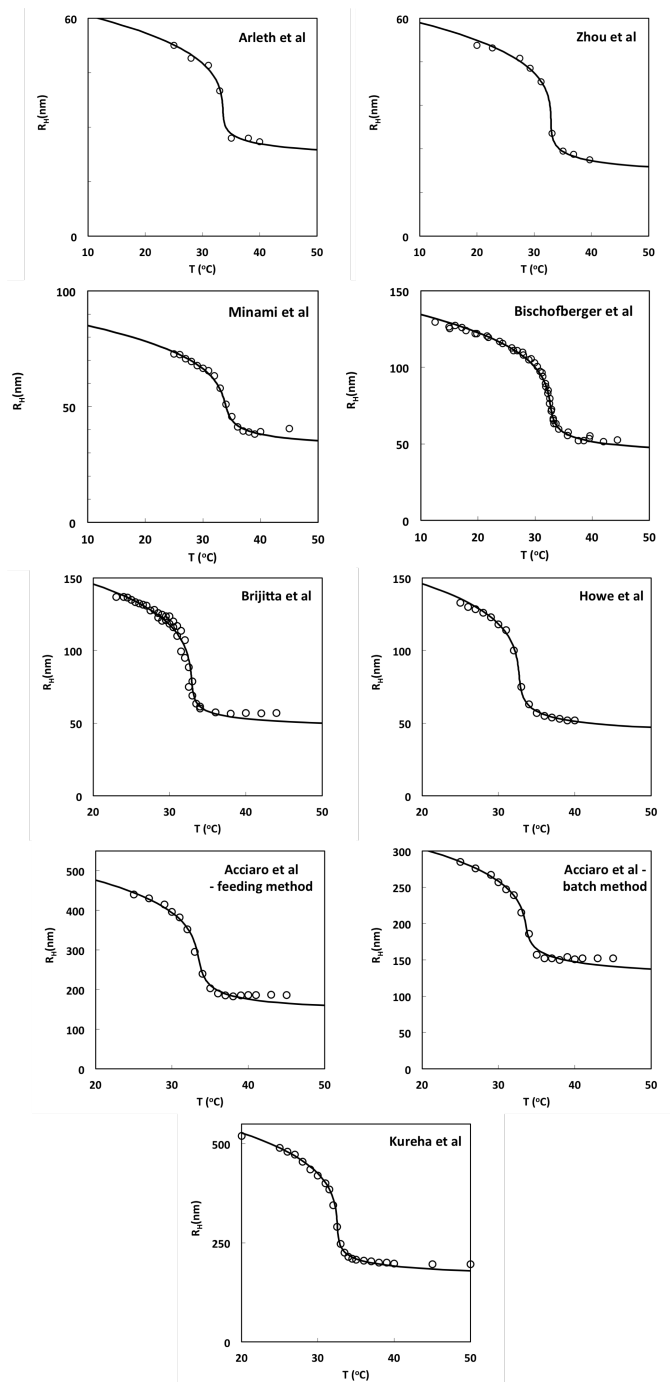

FIG. S1. Fits to different datasets from references [2–9].

<sup>a)</sup>lopez@pc.rwth-aachen.de

\* Not really

shows the best fit parameters obtained when  $f$  is fixed

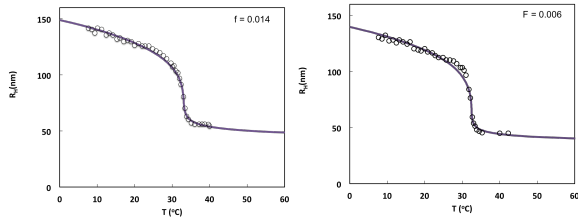

FIG. S2. Fits to datasets of Senff and Richtering, degree of cross-linking indicated on the graphs. The value of  $\phi_0$  (see Table I of the main text) corresponds to the best fit value for each dataset.

at different values.

If  $f \simeq 0.3f_{syn}$  is used,  $C$  and  $D$  are approximately independent of cross linking density and  $A$  approaches the range expected from equation 5 (although its still  $\simeq \times 5$  larger). The effective value of  $f$  may be expected to be lower than the nominal one, as explained in the main manuscript due to non-uniform cross-linking. However, analysing the data of Arleth et al, for which the cross-linking is approximately uniform, we again find  $f \simeq 0.05f_{syn}$  is required to obtain a value of  $A \simeq -0.3$ . Given that in this case cross-linking is homogeneous, this would require that some 95% of the cross-linker remain unreacted. It seems more likely that the affine network model overestimates the elastic contribution of network strands, which therefore leads to reasonable fit parameters for  $\chi$  when an artificially low value of  $f$  is used.

Acciario's data show that homogeneously cross-linked samples swell to a greater degree than heterogeneously cross-linked ones, which would therefore require a higher value of  $f$  to be used for the data considered in the main text, resulting in greater disagreement between fit values of  $A$  and independent estimates from equation 5. The fit to the homogeneously a cross-linked sample prepared by Acciario et al confirms this with a value of  $A \simeq -5$ .

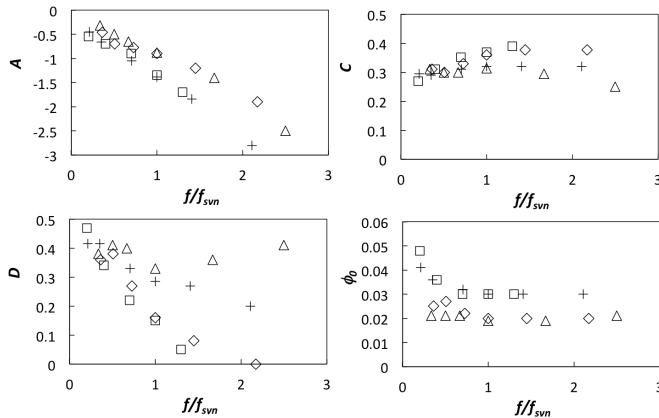

FIG. S3. Fit results to dataset by Senff and Richtering. Best fit values of  $A$ ,  $C$ ,  $D$  and  $\phi_0$  as a function of chosen value of  $f$  divided by the nominal value of  $f$ . Different symbols correspond to the different nominal cross-linking values:  $f = 0.05$  ( $\square$ ),  $f = 0.029$  ( $+$ ),  $f = 0.014$  ( $\diamond$ ),  $f = 0.006$  ( $\triangle$ ).

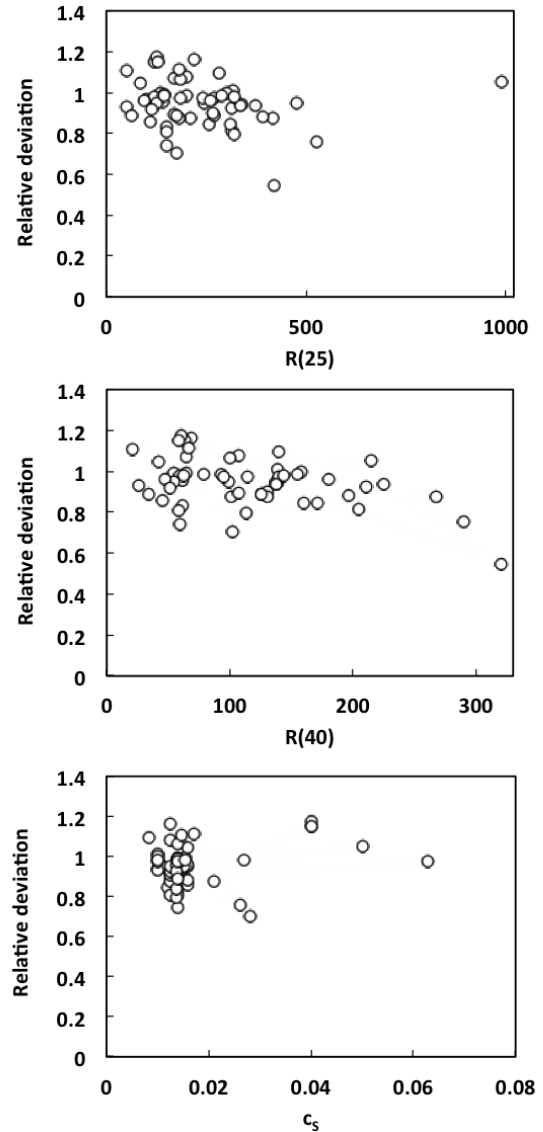

FIG. S4.  $[R_H(25^\circ \text{C})/R_H(40^\circ \text{C})]/(0.966f^{-0.2})$  as a function of different parameters.  $c_S$  is the total monomer concentration at synthesis in wt/wt. Note this is not the same as the polymer concentration inside a microgel particle.

#### IV. EFFECT OF SYNTHESIS ON SWELLING PROPERTIES

Figure S4 shows the relative deviation between  $R_H(25)/R_H(40)$  data and the best fit equation  $R_H(25)/R_H(40) = 0.966f^{-0.2}$ , as a function of different parameters. No systematic deviations are found with any of the parameters considered.

- <sup>1</sup>H. Senff and W. Richtering, "Influence of cross-link density on rheological properties of temperature-sensitive microgel suspensions," *Colloid & Polymer Science*, vol. 278, no. 9, pp. 830–840, 2000.
- <sup>2</sup>L. Arleth, X. Xia, R. P. Hjelm, J. Wu, and Z. Hu, "Volume transition and internal structures of small poly (N-isopropylacrylamide) microgels," *Journal of Polymer Science Part B: Polymer Physics*, vol. 43, no. 7, pp. 849–860, 2005.
- <sup>3</sup>J. Zhou, G. Wang, L. Zou, L. Tang, M. Marquez, and Z. Hu, "Viscoelastic behavior and in vivo release of microgel dispersions with inverse thermo-reversible gelation," *Biomacromolecules*, vol. 9, no. 1, p. 142, 2008.
- <sup>4</sup>S. Minami, T. Watanabe, D. Suzuki, and K. Urayama, "Rheological properties of suspensions of thermo-responsive poly (N-isopropylacrylamide) microgels undergoing volume phase transition," *Polymer Journal*, vol. 48, no. 11, pp. 1079–1086, 2016.
- <sup>5</sup>I. Bischofberger and V. Trappe, "New aspects in the phase behaviour of poly-N-isopropyl acrylamide: systematic temperature dependent shrinking of PNiPAM assemblies well beyond the LCST," *Scientific reports*, vol. 5, p. 15520, 2015.
- <sup>6</sup>J. Brijitta, B. Tata, and T. Kaliyappan, "Phase behavior of poly (N-isopropylacrylamide) nanogel dispersions: temperature dependent particle size and interactions," *Journal of Nanoscience and Nanotechnology*, vol. 9, no. 9, pp. 5323–5328, 2009.
- <sup>7</sup>A. J. Howe, A. M. Howe, and A. F. Routh, "The viscosity of dilute poly (N-isopropylacrylamide) dispersions," *Journal of Colloid and Interface Science*, vol. 357, no. 2, pp. 300–307, 2011.
- <sup>8</sup>R. Acciaro, T. Gilnyi, and I. Varga, "Preparation of monodisperse poly (n-isopropylacrylamide) microgel particles with homogenous cross-link density distribution," *Langmuir*, vol. 27, no. 12, pp. 7917–7925, 2011.
- <sup>9</sup>T. Kureha, T. Sato, and D. Suzuki, "Relationship between temperature-induced changes in internal microscopic structures of poly (N-isopropylacrylamide) microgels and organic dye uptake behavior," *Langmuir*, vol. 30, no. 29, pp. 8717–8725, 2014.
-
